# Supplementary material
Source: Springer Nature journal article supplement (https://www.springermedizin.de/resource/supplementary/12911_2012_685_MOESM8_ESM.pdf/9526396)
Supplement: MOESM8 [file 9526396]

# URI retrieving the XML representation of a specific VERSION within a VERSIONED COMPOSITION

http://localhost:8182/ehr:Medinfo-Example-EHR-ID/c90103a0-0f02-4ae5-9a85-af82cb5068fb::test2.eee.mi.imt.liu.se::1?media=text/xml

**Nesting structure:**  
 EHR > Versioned Objects > Versions  
 Composition > Sections > Entries > Data structures >  
 Item structures > Data types (values)

| Node              | Content                                                         |
|-------------------|-----------------------------------------------------------------|
| ee:versions       |                                                                 |
| v1:uid            |                                                                 |
| v1:value          | c90103a0-0f02-4ae5-9a85-af82cb5068fb::test2.eee.mi.imt.liu.se:1 |
| v1:contribution   |                                                                 |
| v1:id             |                                                                 |
| v1:value          | 3c2efebb-cb01-4d50-88ea-1a61cf1ab461                            |
| data              |                                                                 |
| archetype_node_id | openEHR-EHR-COMPOSITION.encounter.v1                            |
| xs:type           | COMPOSITION                                                     |
| name              |                                                                 |
| value             | BP Checkup visit                                                |
| content           |                                                                 |
| archetype_node_id | openEHR-EHR-OBSERVATION.blood_pressure.v1                       |
| xs:type           | OBSERVATION                                                     |
| name              |                                                                 |
| value             | Blood Pressure                                                  |
| data              |                                                                 |
| archetype_node_id | at0001                                                          |
| events            |                                                                 |
| archetype_node_id | at0006                                                          |
| xs:type           | POINT_EVENT                                                     |
| time              |                                                                 |
| value             | 2007-11-07T14:29:00                                             |
| data              |                                                                 |
| archetype_node_id | at0003                                                          |
| xs:type           | ITEM_LIST                                                       |
| items             |                                                                 |
| archetype_node_id | at0004                                                          |
| name              |                                                                 |
| value             | systolic                                                        |
| value             |                                                                 |
| xs:type           | DV_QUANTITY                                                     |
| magnitude         | 190                                                             |
| units             | mm[Hg]                                                          |
| items             |                                                                 |
| archetype_node_id | at0005                                                          |
| name              |                                                                 |
| value             | diastolic                                                       |

/data[openEHR-EHR-COMPOSITION.encounter.v1]

(no section in this example)

/content[openEHR-EHR-OBSERVATION.blood\_pressure.v1]

/data

/events[at0006]

/data

/items[at0004]

/value

/magnitude

**Path, within the versioned composition, to the systolic blood pressure magnitude above:**

/data[openEHR-EHR-COMPOSITION.encounter.v1]/content[openEHR-EHR-OBSERVATION.blood\_pressure.v1]

/data/events[at0006]/data/items[at0004]/value/magnitude
